# Supplementary material for: CILAT ? a new reagent for quantitative proteomics
Source: Royal Society of Chemistry journal article supplement (doi:10.1039/b700109f), 2007-01-01
Supplement: b700109f.pdf [file b700109f.pdf]

## Supporting Information

### Synthesis of the CILAT reagents

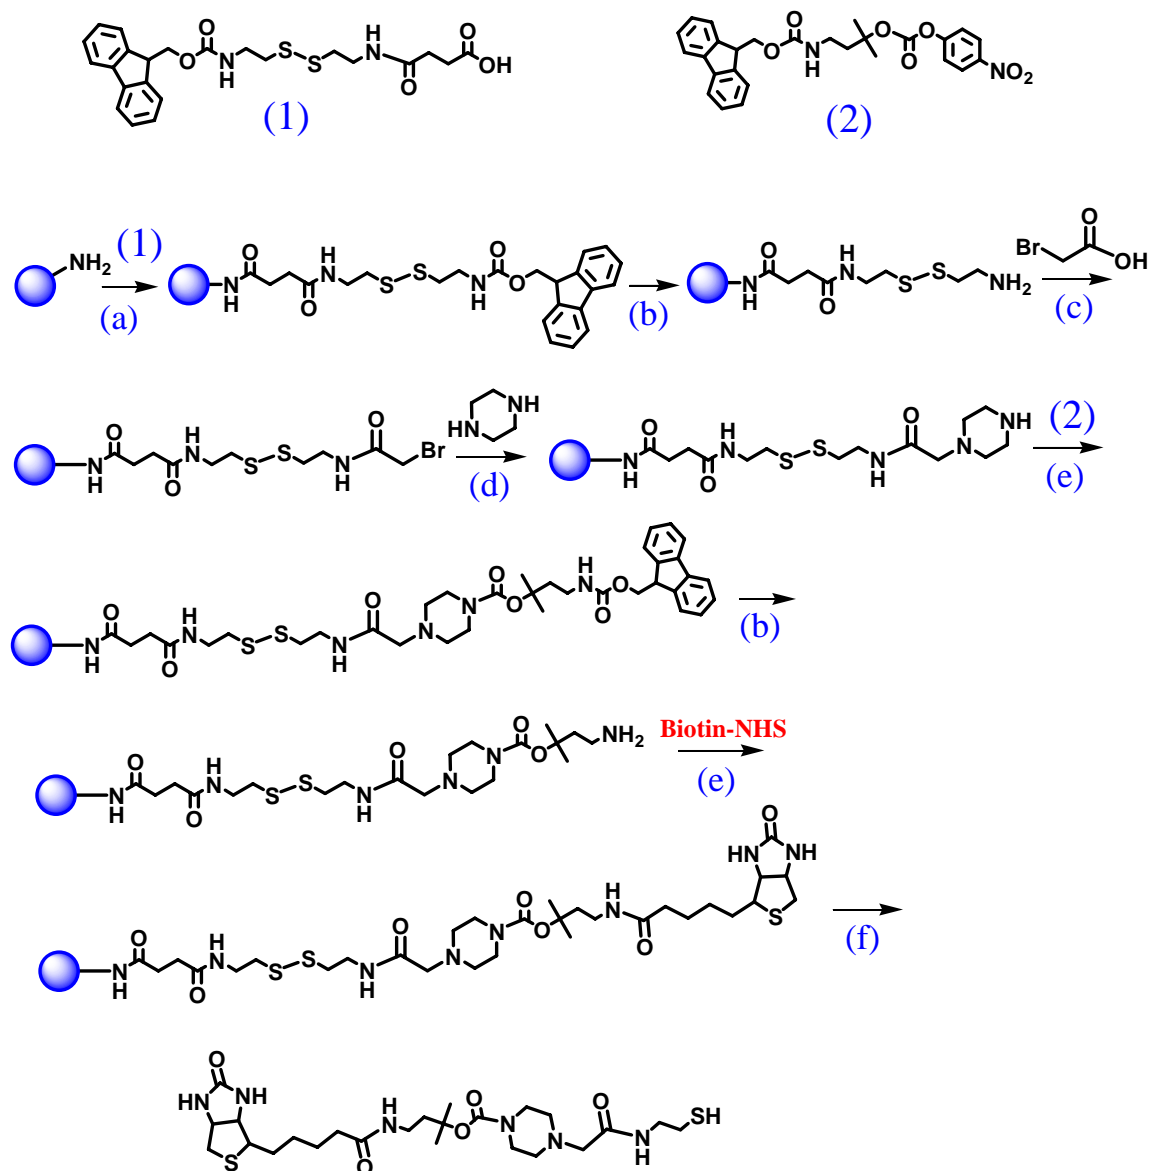

**Figure 1:** Synthetic route of the CILAT reagents. Conditions: (a) HBTU/HOBt/DIPEA; (b) piperidine; (c) DIC; (d) TEA; (e) HOBt/DIPEA; (f) TCEP.

The CILAT reagents were prepared on a 433A peptide synthesizer automatically (Applied Biosystems) using a modified program. NovaSyn HL amine resin (20  $\mu\text{mol}$  loading, Novabiochem) was used as solid support to coupled with five-fold excess of compound-1 (compared to the resin substitution, see reference #12) using standard peptide coupling condition. After Fmoc group was deprotected with 20% piperidine in NMP (N-methylpyrrolidinone), 15-fold excess of either 1- $^{13}\text{C}$  or 2- $^{13}\text{C}$  coded bromoacetic acid (Cambridge Isotope Laboratories) was mixed with equal amount of

DIC (diisopropylcarbodiimide) in NMP to react with the resin for 45 mins. Then, 35-fold excess of piperazine (compared to the resin substitution) was mixed with 35-fold excess of TEA (triethylamine) in 85:15 NMP: methanol to react with resin for another 45 mins. Next, five-fold excess of compound-2 (see reference #12) was mixed with equal amount of HOBt and DIPEA (diisopropylethylamine) to react with the resin for 45 mins. Fmoc group was then removed again with 20% piperidine, followed by the reaction with the mixture of five-fold excess of biotin-NHS, HOBt, and DIPEA for 45 mins. The final product was cleaved from the resin with cleavage solution (250 mM TCEP in 50% methanol, pH = 4.6) and purified by HPLC. ESI-MS:  $(M+H)^+ = 559.5$ . Calculated  $(M+H)^+ = 560.3$

### Procedure

Two tubes of bovine serum albumin (BSA) were treated exactly the same as described below. 200  $\mu$ g BSA (20  $\mu$ L, 10 mg/mL) was mixed with 40  $\mu$ L denaturing buffer (200 mM Tris, pH=8.3; 8M urea) and 15  $\mu$ L reducing buffer (TCEP, 25 mM, pH=4.6), sealed, and then heated at 100 °C for 10 mins. Bromoacetamide solution (500 mM, 1.5  $\mu$ L) was added and incubated at 37 °C for 2 hrs in dark. DTT solution (1M, 1.5 $\mu$ L) was then added and incubated at 37 °C for 30 mins to quench the extra alkylation reagent. After the mixture was diluted with water (322  $\mu$ L), 10  $\mu$ g trypsin (sequencing grade) was added and the digestion was kept at 37 °C for 20 hrs. The resulting solution was then desalted with a C<sub>18</sub> reverse phase column, dried in a SpeedVac and redissolved in 500  $\mu$ L phosphate buffer (50 mM, pH=8.0). 10  $\mu$ g trypsin was added again and the mixture was incubated for 3 hrs at 37 °C to make sure complete digestion of proteins. The trypsin was then removed by incubating with immobilized trypsin inhibitor (SigmaAldrich, 100  $\mu$ L bed volume, capacity: 1.7 mg/mL), which was filtered out after 30 mins. 100  $\mu$ L solution was taken out from each tube and added with 2  $\mu$ L “light” and “heavy” tags (5 mM) respectively, together with 3  $\mu$ L tyrosinase. The reaction was kept at room temperature for 1 hr and two tubes were mixed together. The extra labeling reagents were removed with a disposable SCX column (Fisher). The biotinylated peptides were enriched with immobilized monoavidin (Pierce) and eluted with 30% acetonitrile containing 1 mM biotin and 0.4% TFA. The elution was dried in a SpeedVac and the residue was deprotected with a cocktail (100  $\mu$ L, 88:5:5:2 TFA:water:phenol:TIS) for 2 hrs. After the solution was removed in a lyophilizer, the peptides were dissolved in 50% acetonitrile for MALDI-MS/MS assay.

Annotated MS/MS of the precursor ions at 1697.8 and 1942.9 are attached as below. There are several peaks labeled with an asterisk (\*) that are not identified on the spectrum of 1697.8. These peaks might be the fragments of a contaminating precursor ion at 1700.0, which could be removed if the sample were fractionated with LC prior to MS experiment.

The expanded region including the signature peaks of the precursor ion at 1697.8 is also included.

# 4700 MS/MS Precursor 1943 Spec #1[BP = 1209.6, 5234]

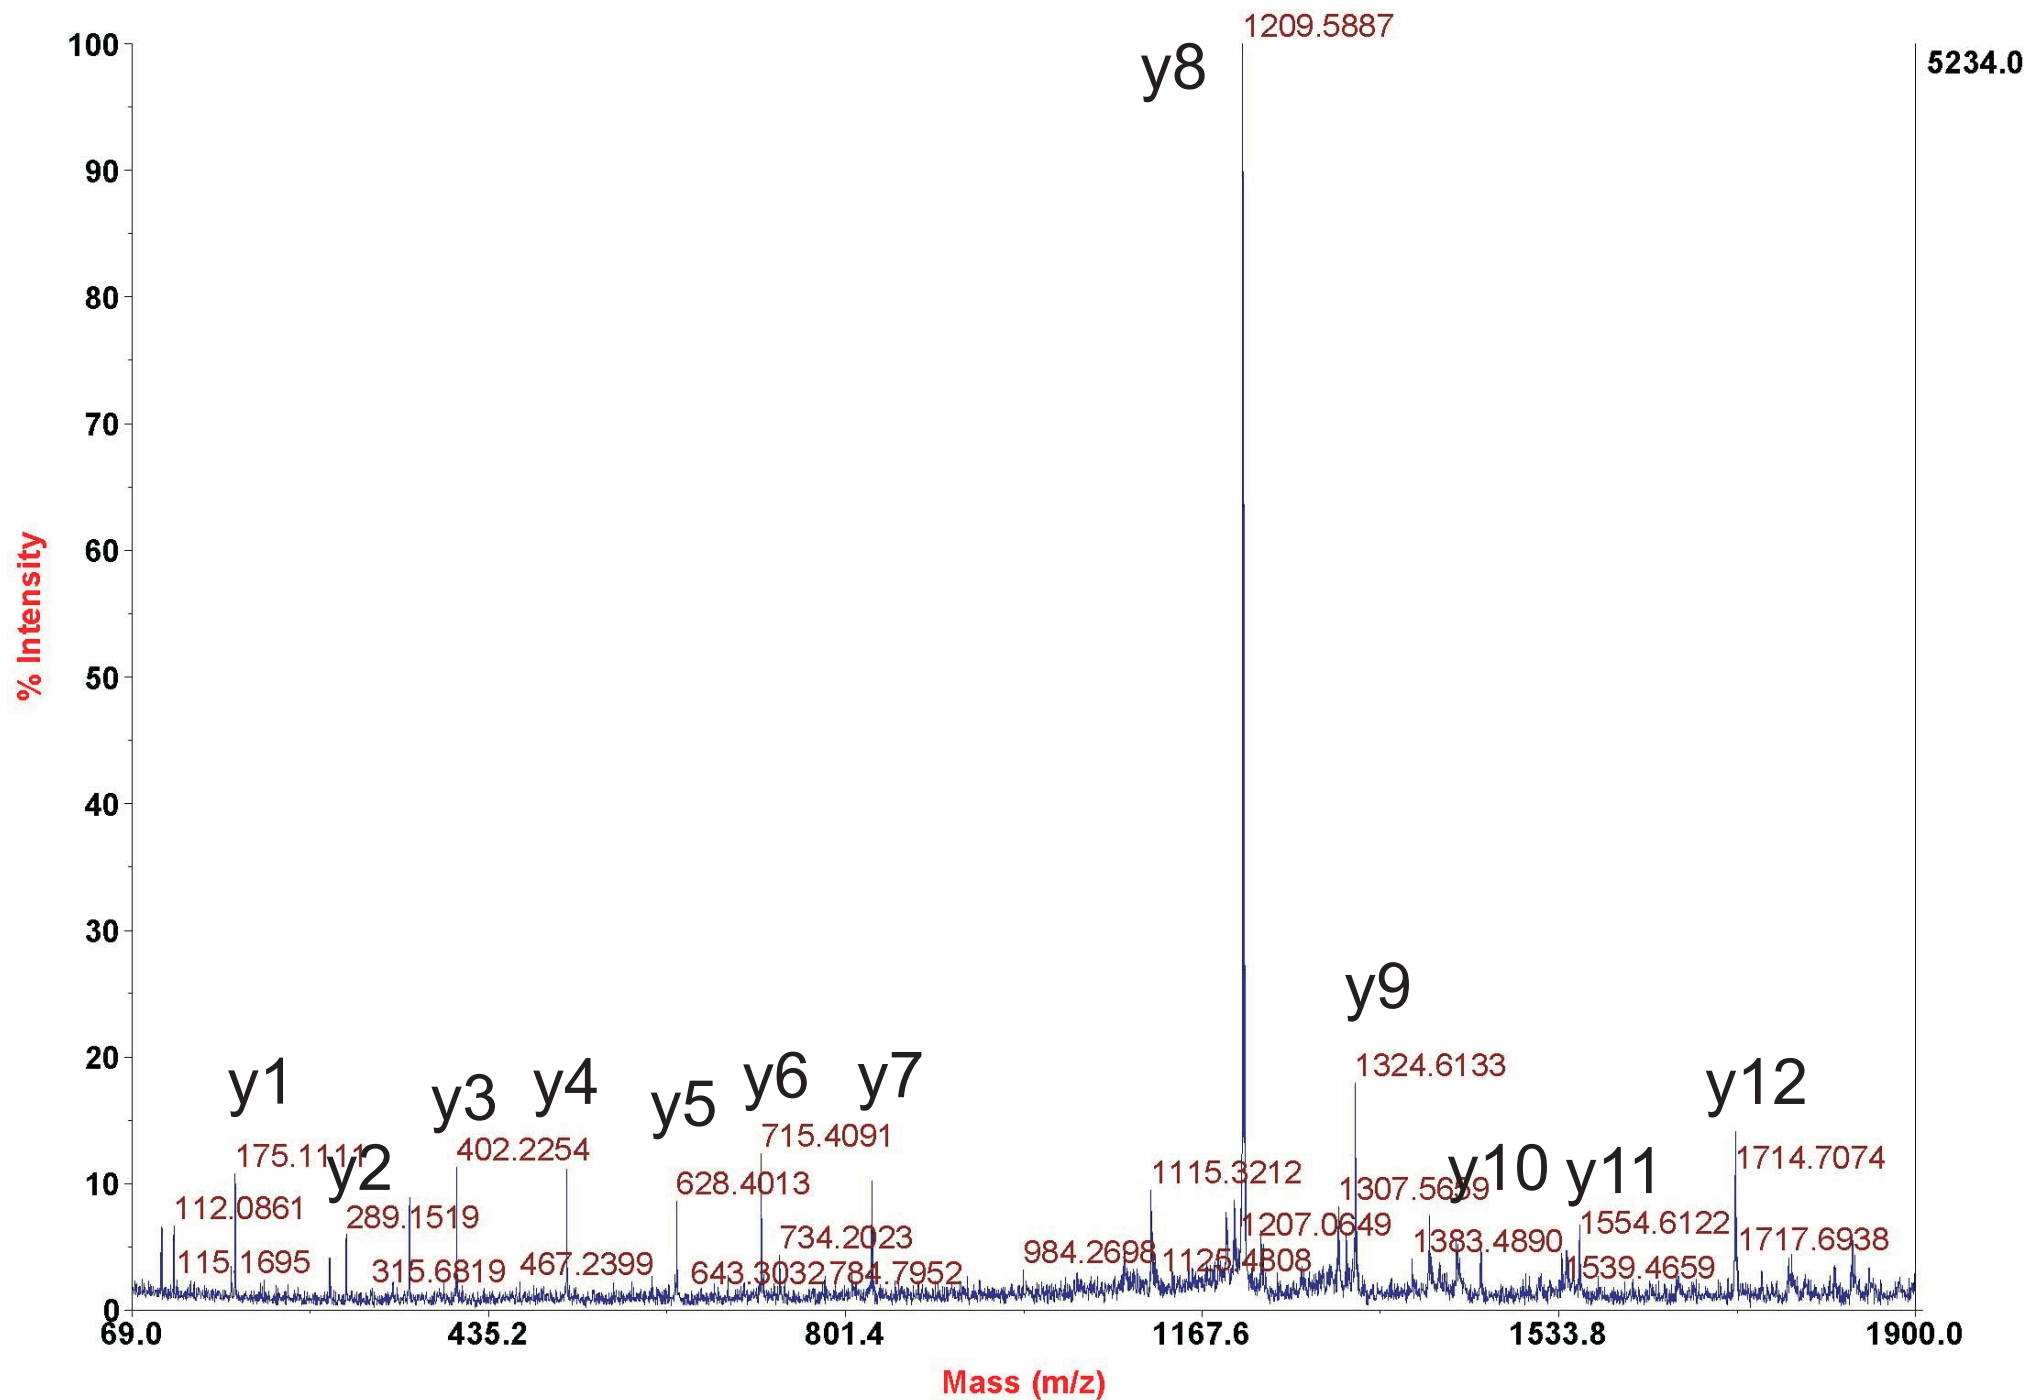

4700 MS/MS Precursor 1697.95 Spec #1[BP = 571.3, 945]

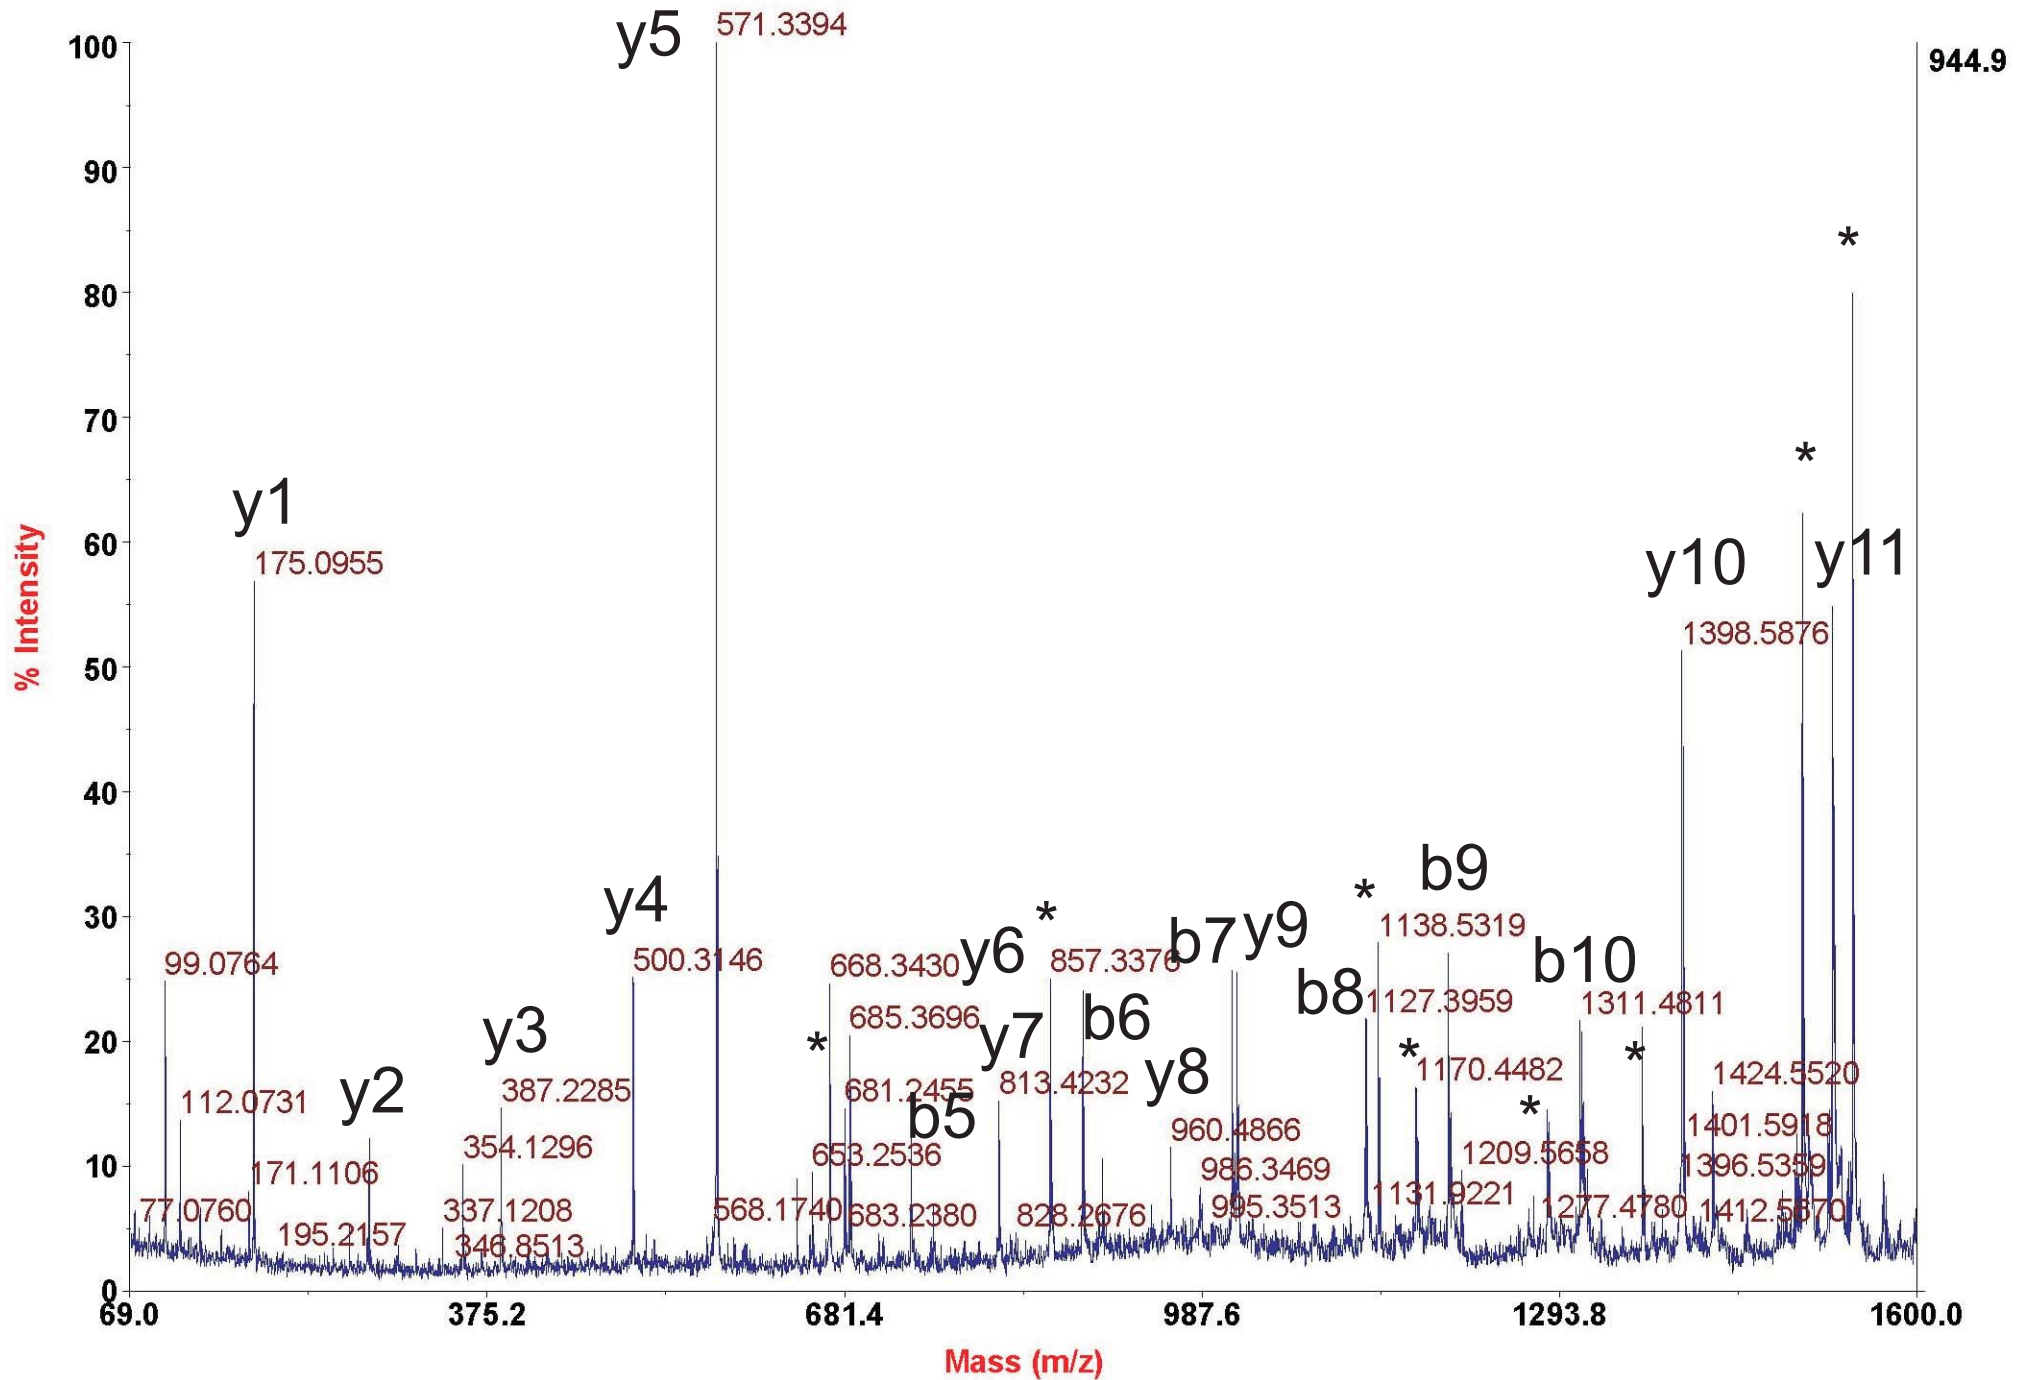

# 4700 MS/MS Precursor 1698 Spec #1[BP = 99.1, 3042]

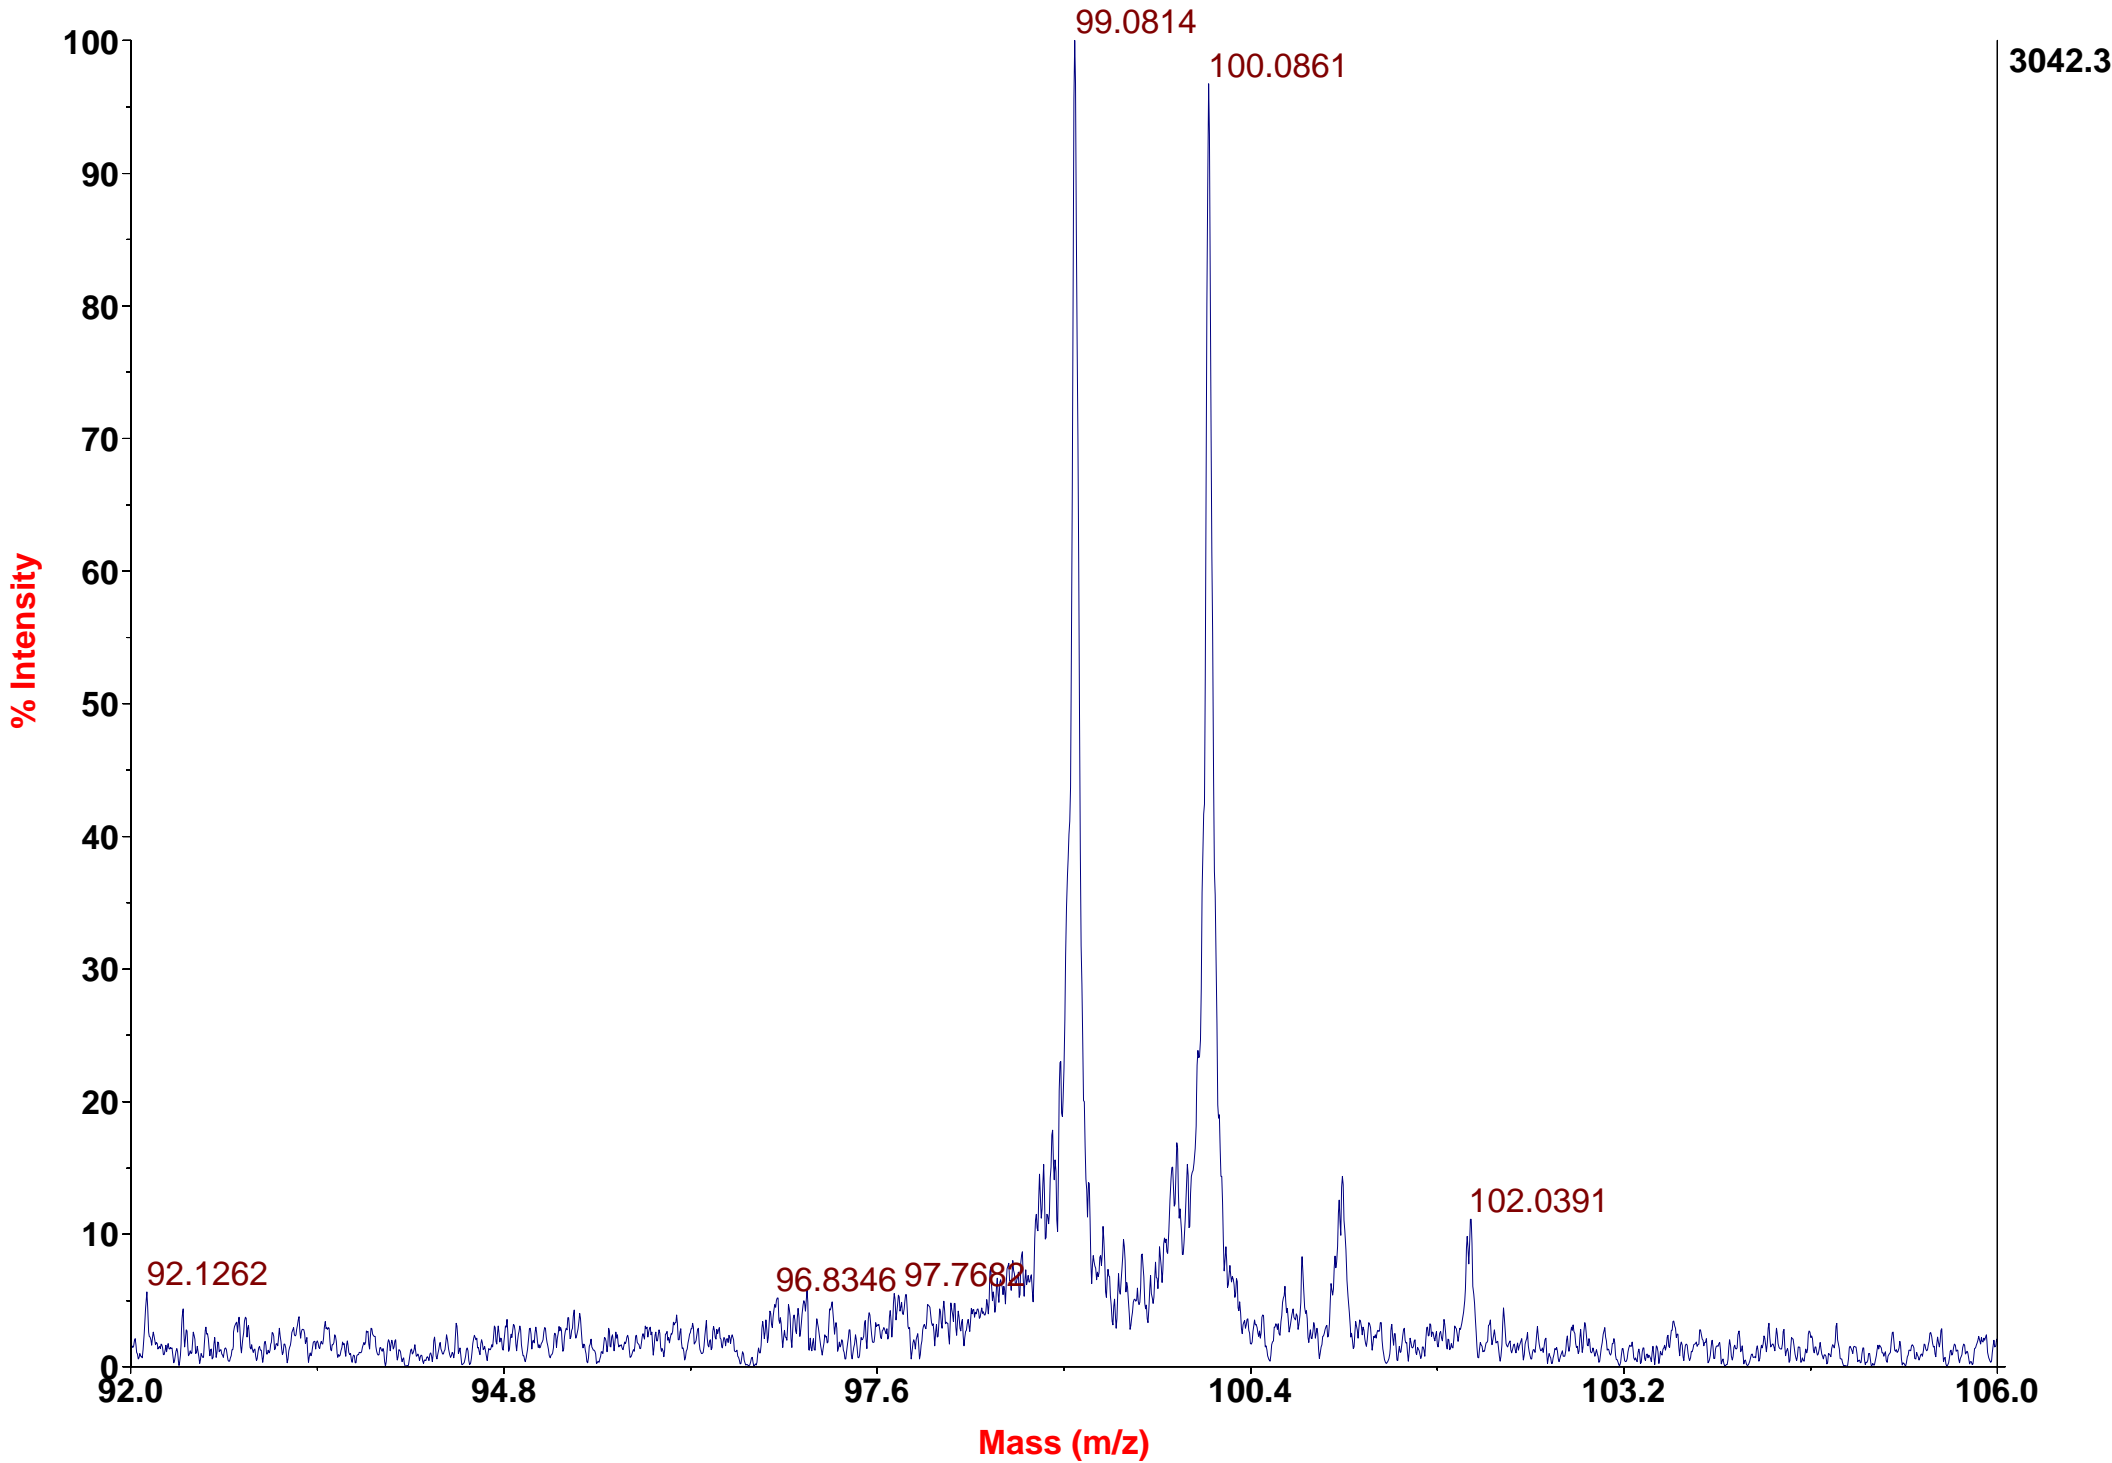

Mariner Spec #16 ASC[BP = 559.4, 979]

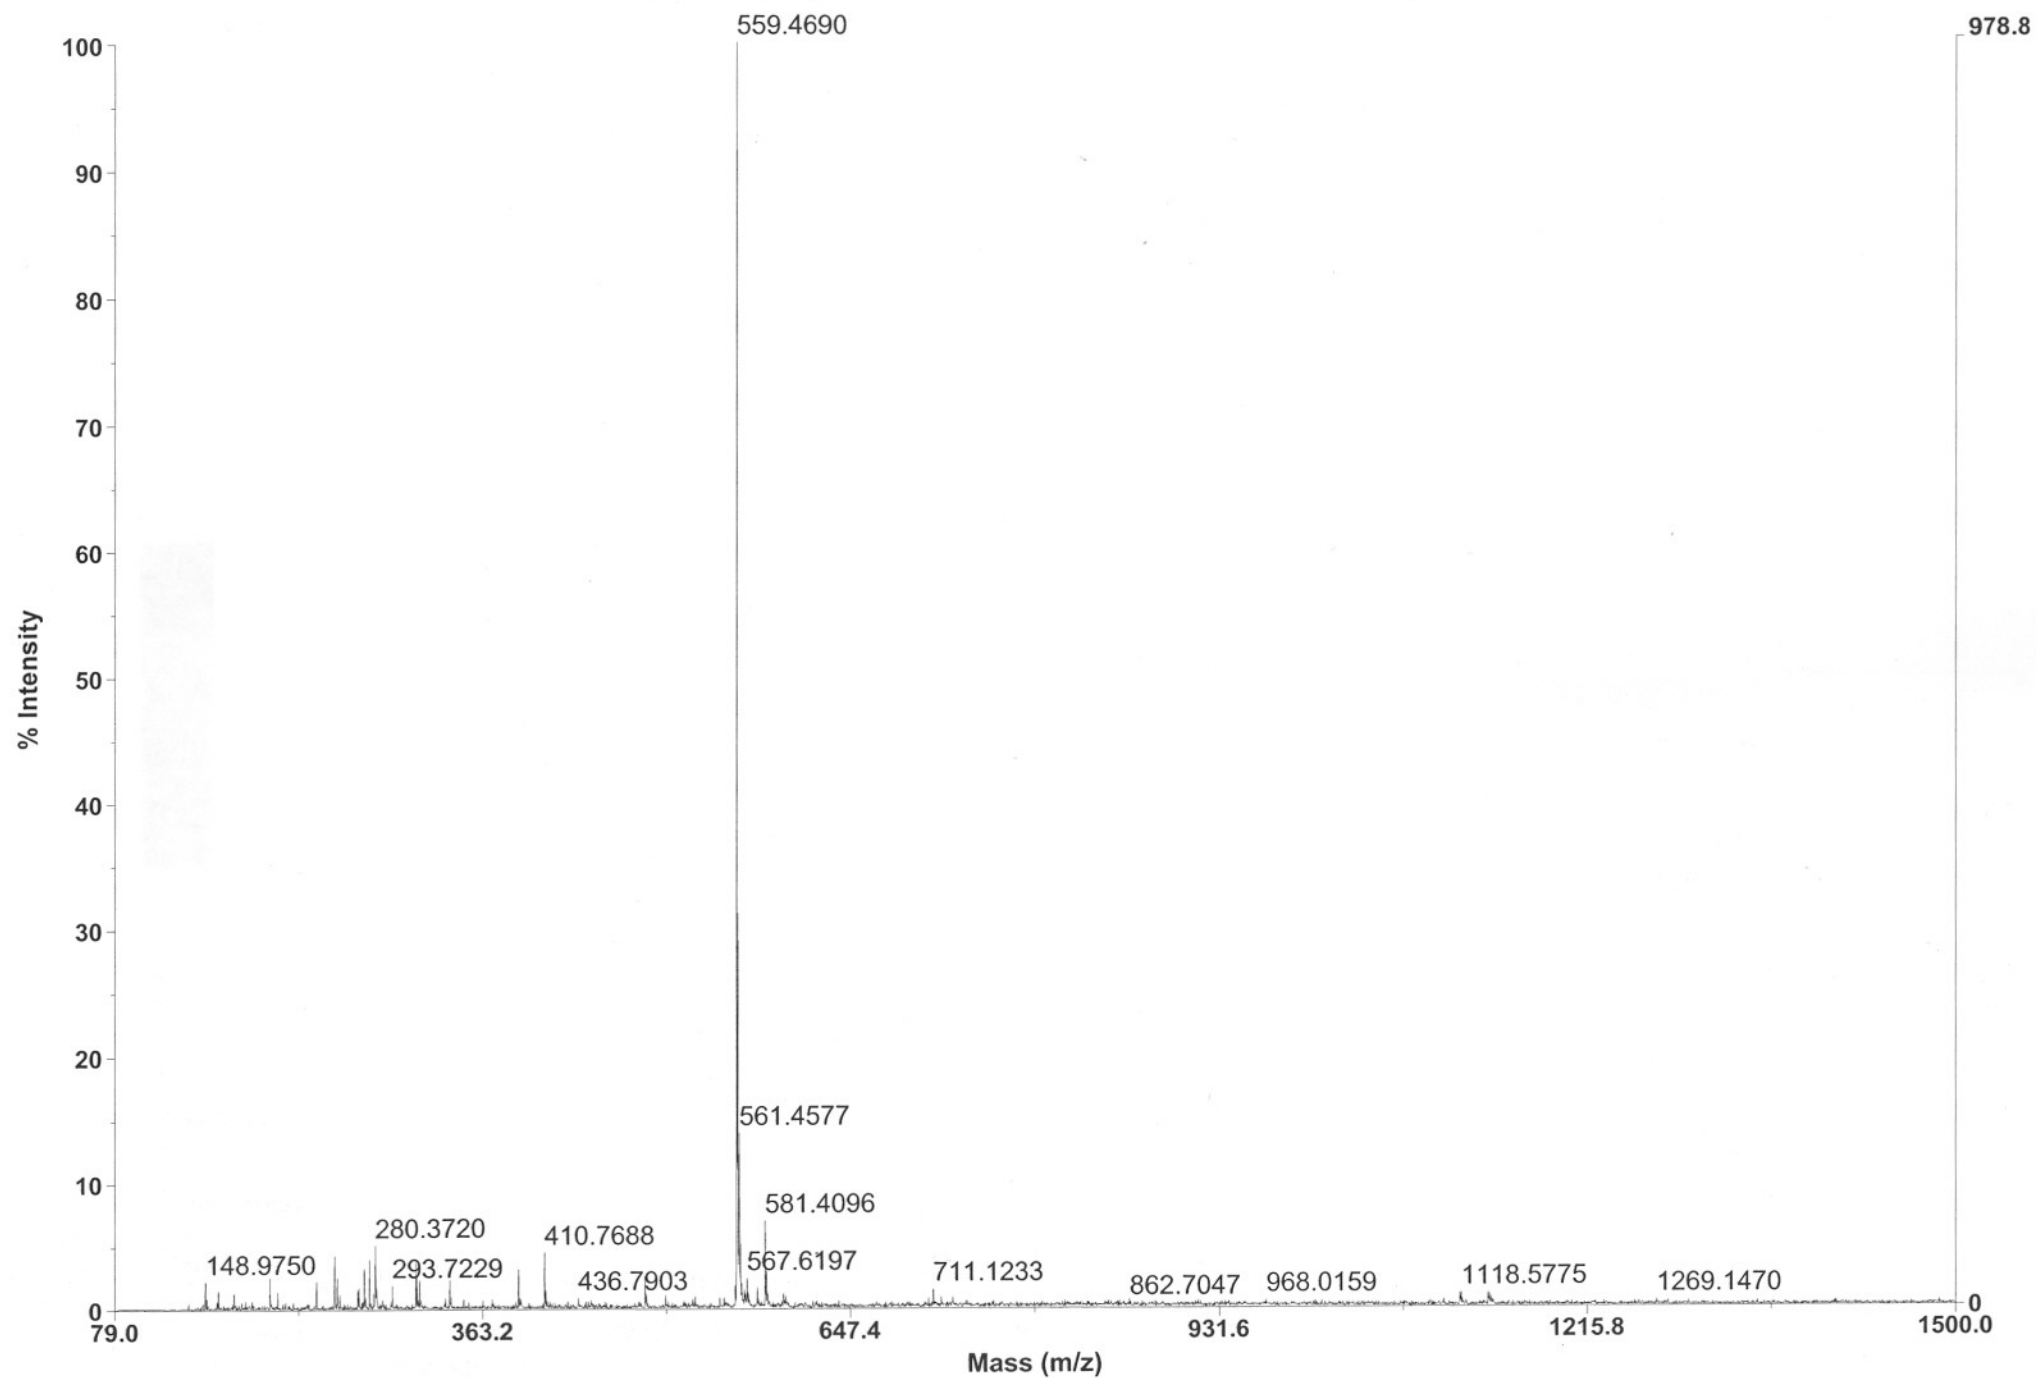

Mariner Mass Spectrum  
C:\...1202b-1.dat  
Acquired: Dec 02 15:57:00 2006
